# Supplementary material
Source: PubMed Central journal article supplement (PMC9359418)
Supplement: NIHMS1826489-supplement-Figure_S7.pdf [file NIHMS1826489-supplement-Figure_S7.pdf]

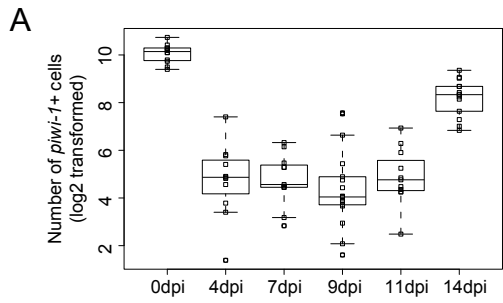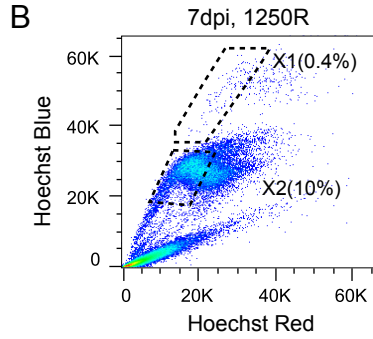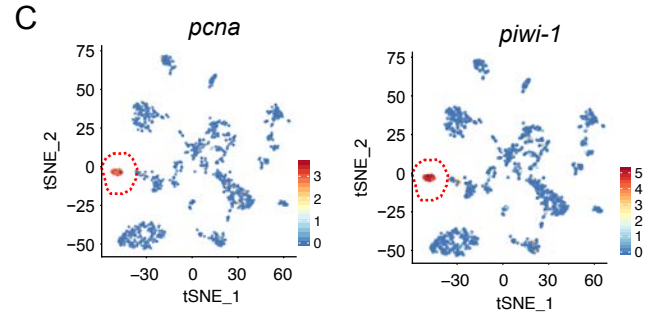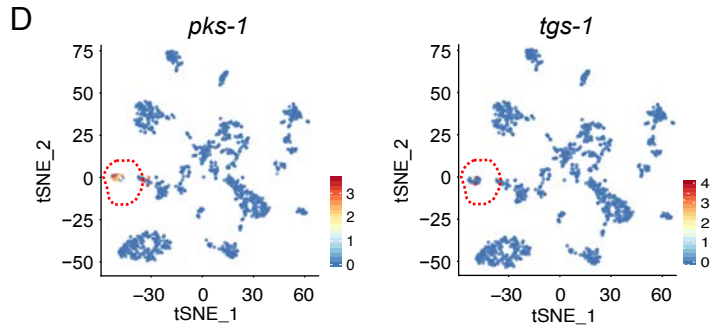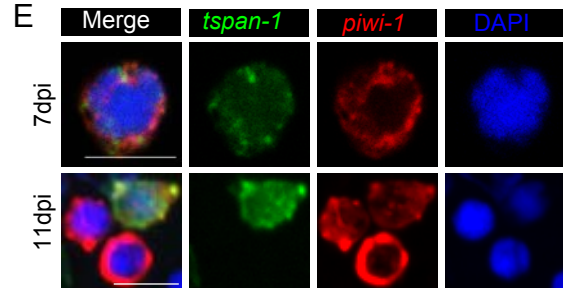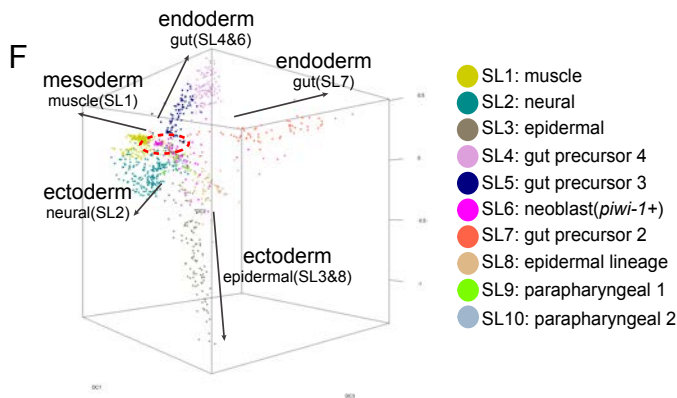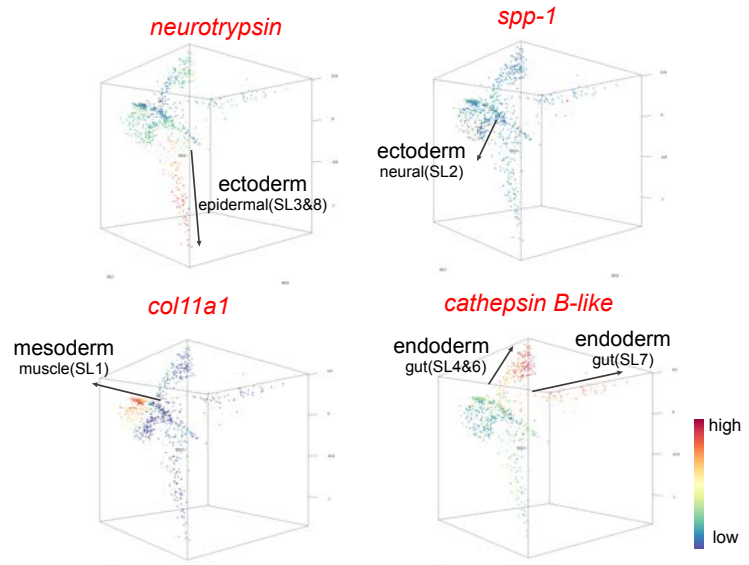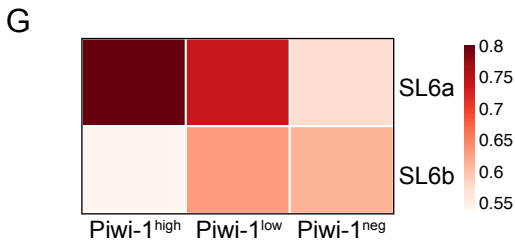

**H** Sublethal irradiated cells (1,039 cells)

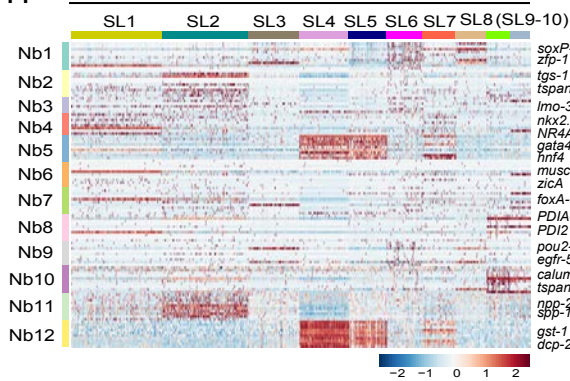

Top10 marker genes for Nb subtypes

**I** Neoblast cells (7,088 cells)

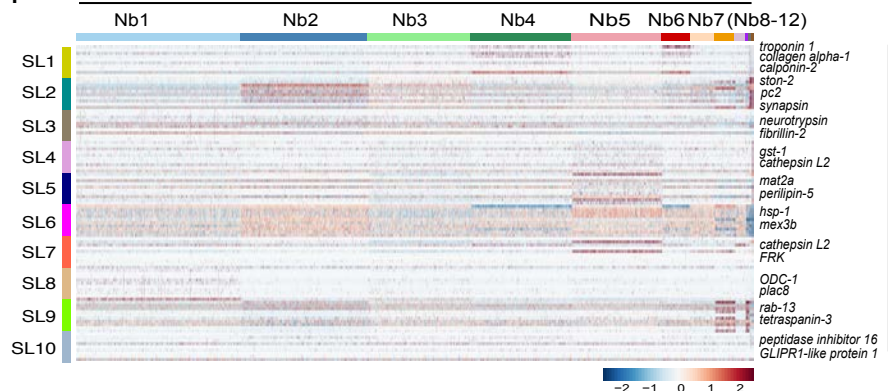

Top10 marker genes for SL subtypes
