# Supplementary material
Source: PubMed Central journal article supplement (PMC9359418)

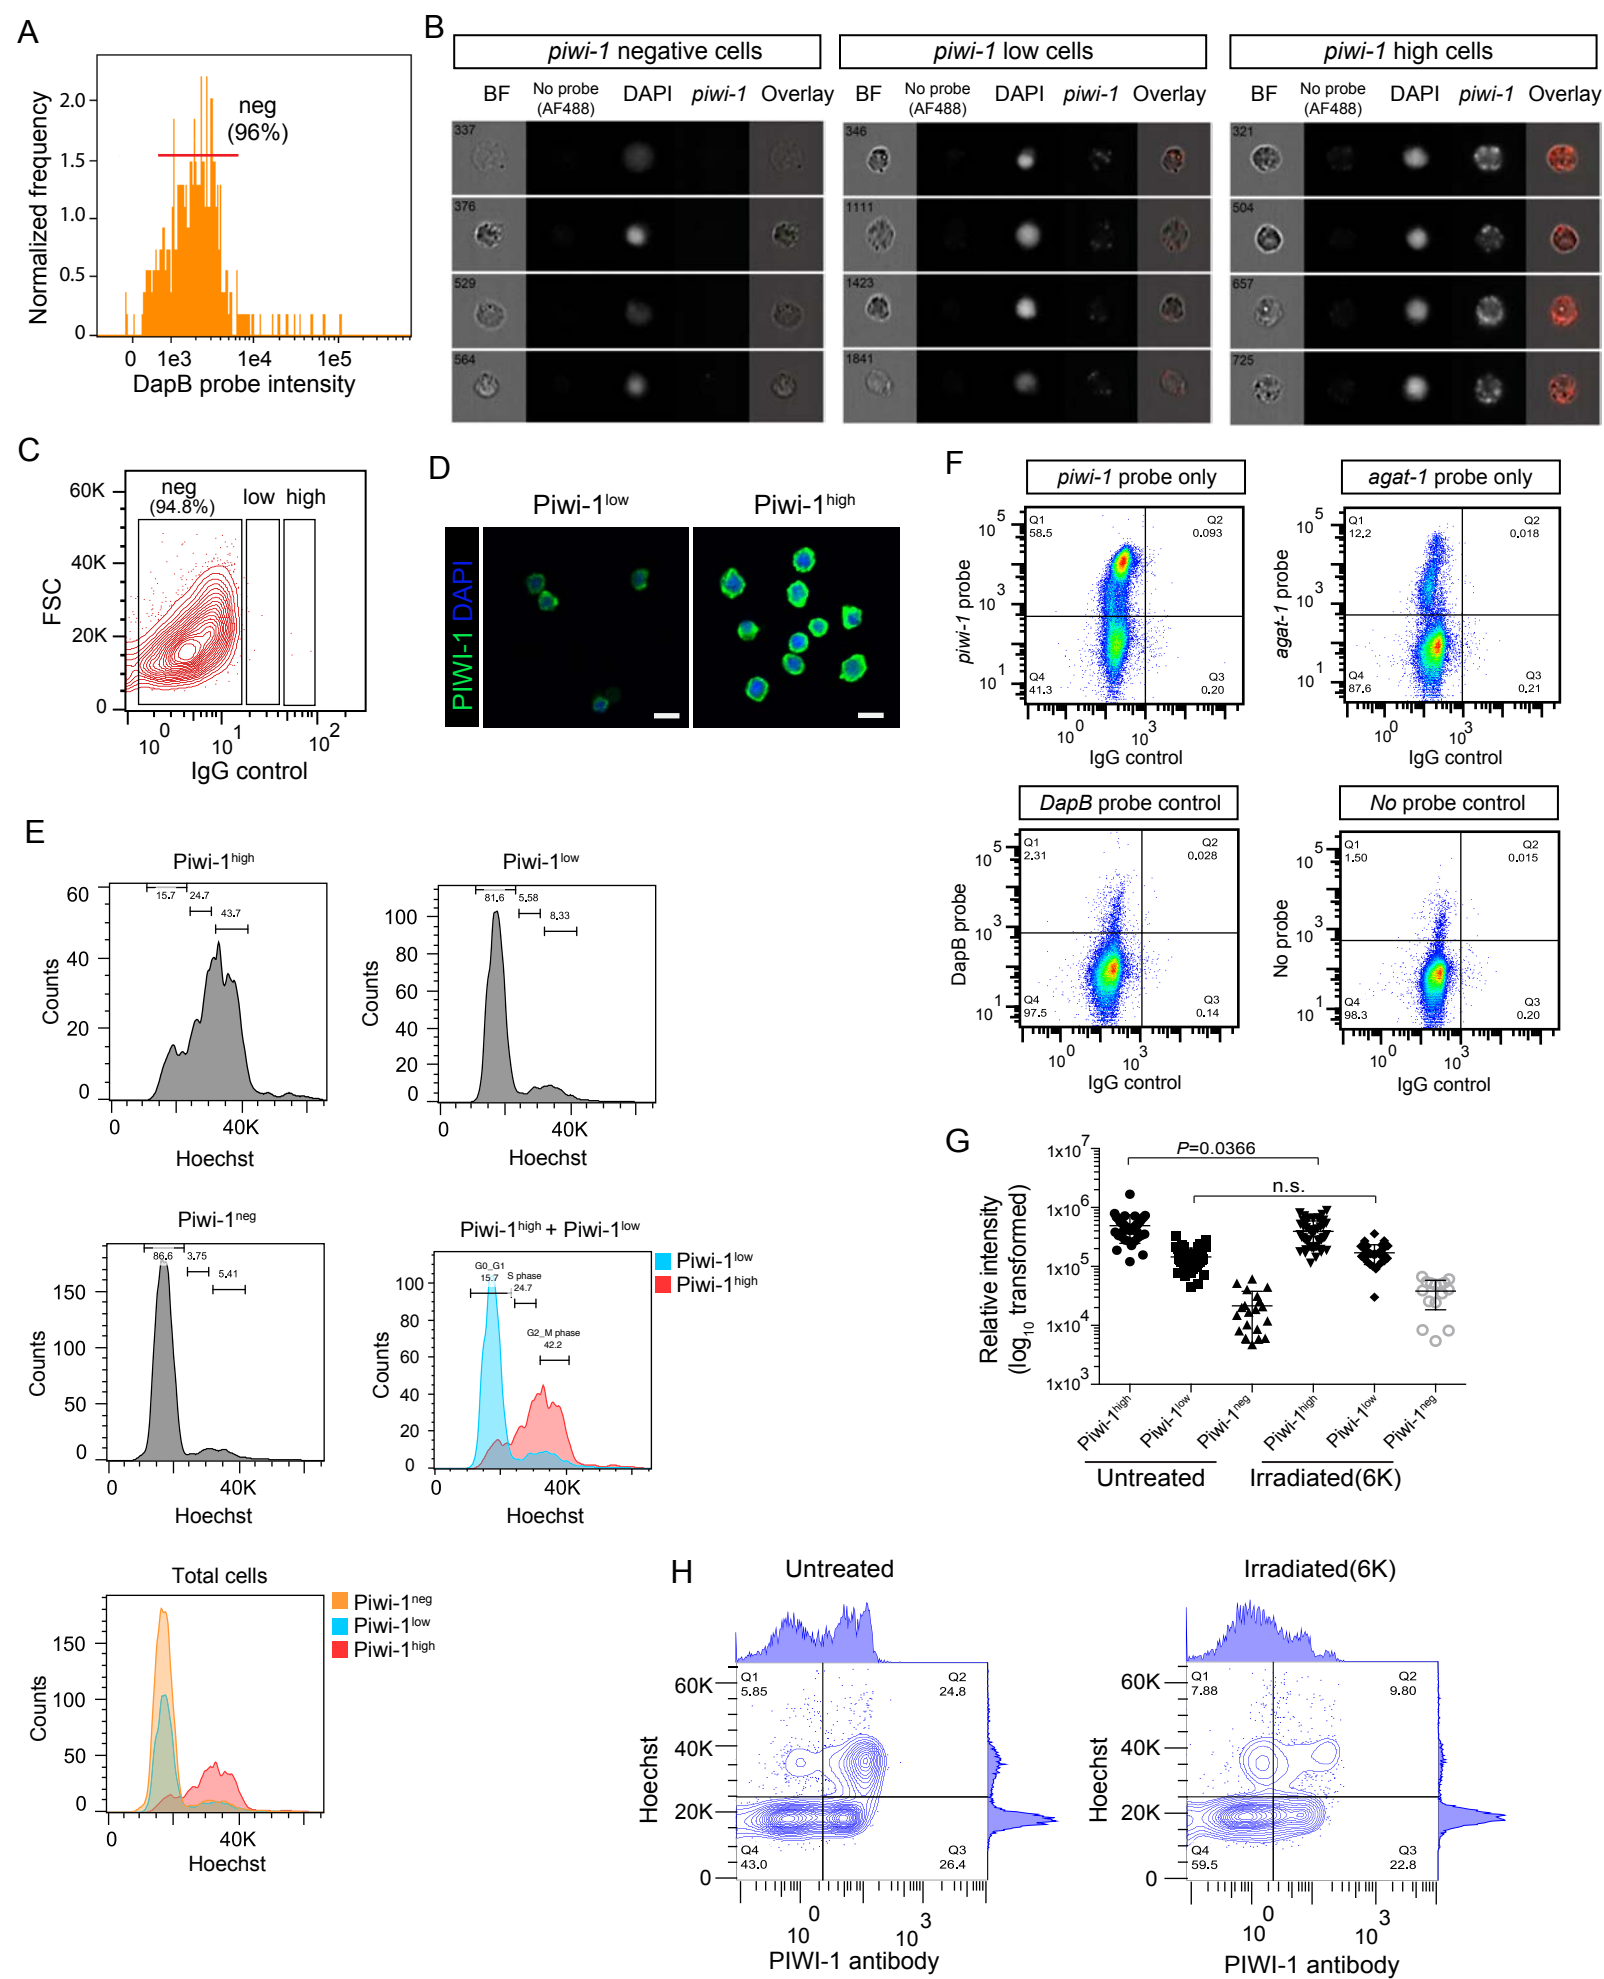

Supplement: NIHMS1826489-supplement-Figure_S1.pdf [file NIHMS1826489-supplement-Figure_S1.pdf]

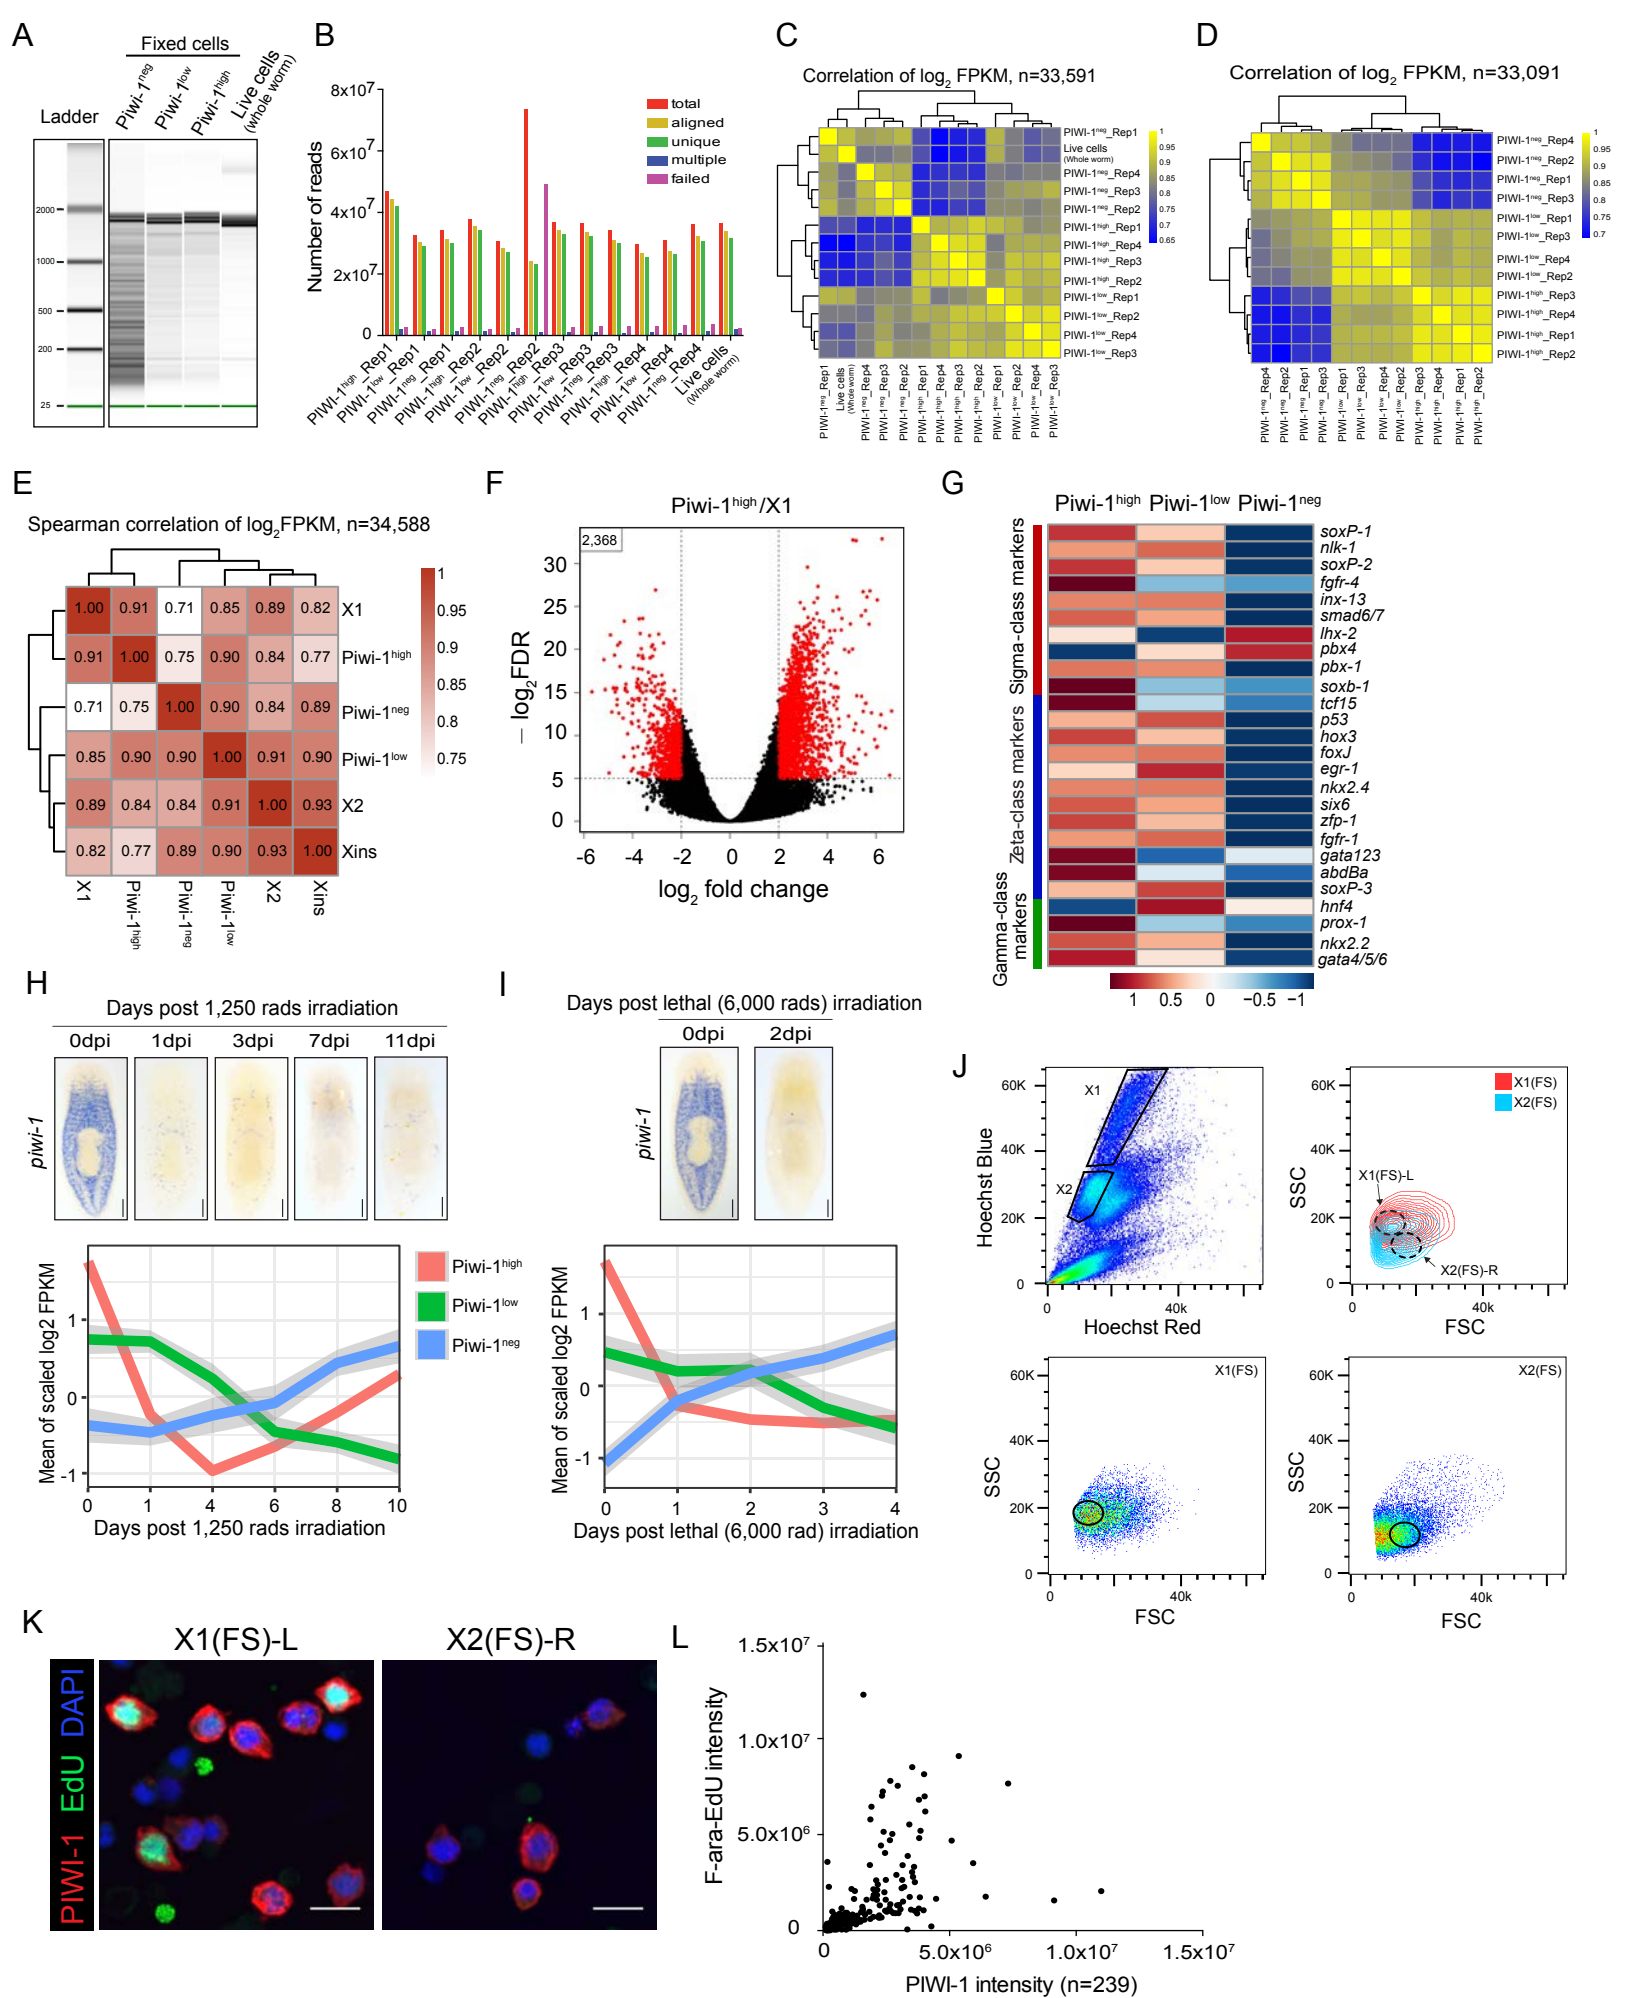

Supplement: NIHMS1826489-supplement-Figure_S2.pdf [file NIHMS1826489-supplement-Figure_S2.pdf]

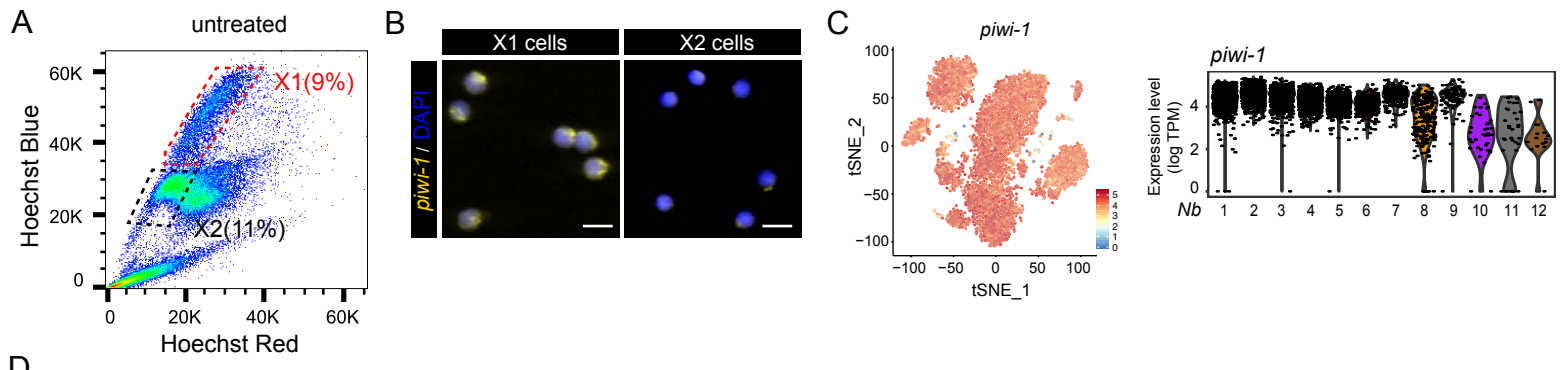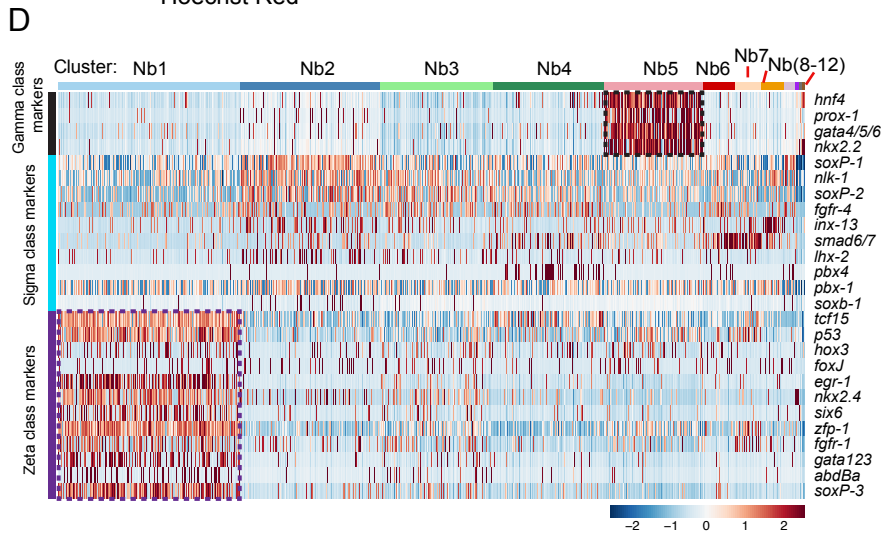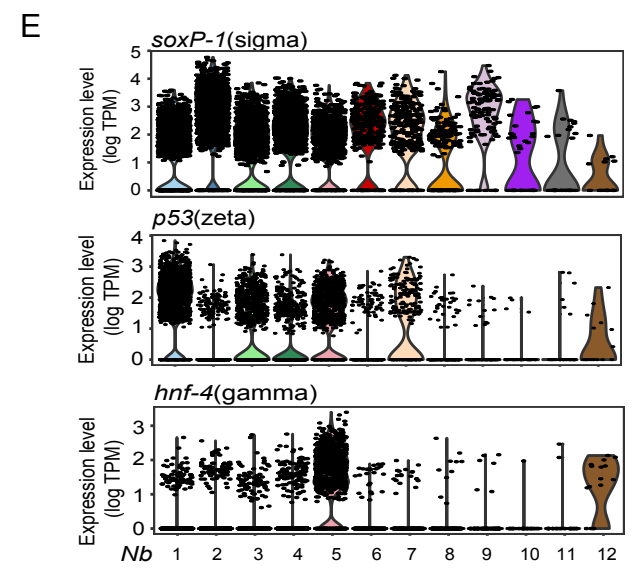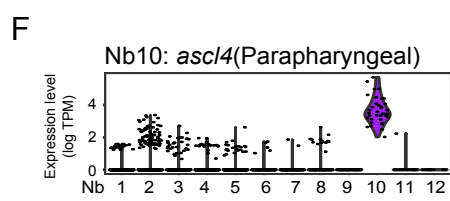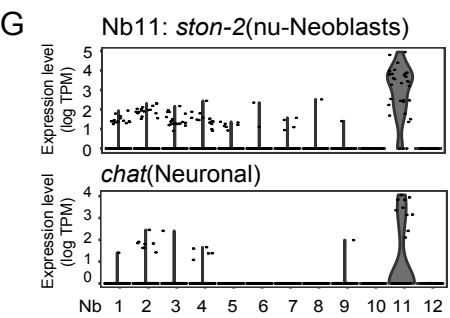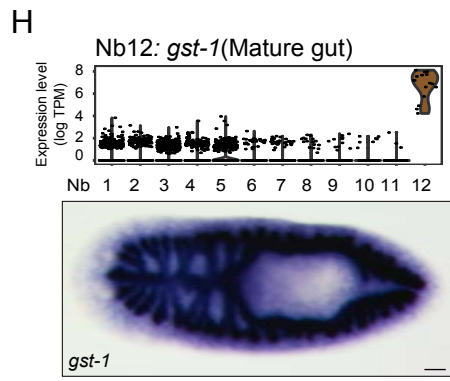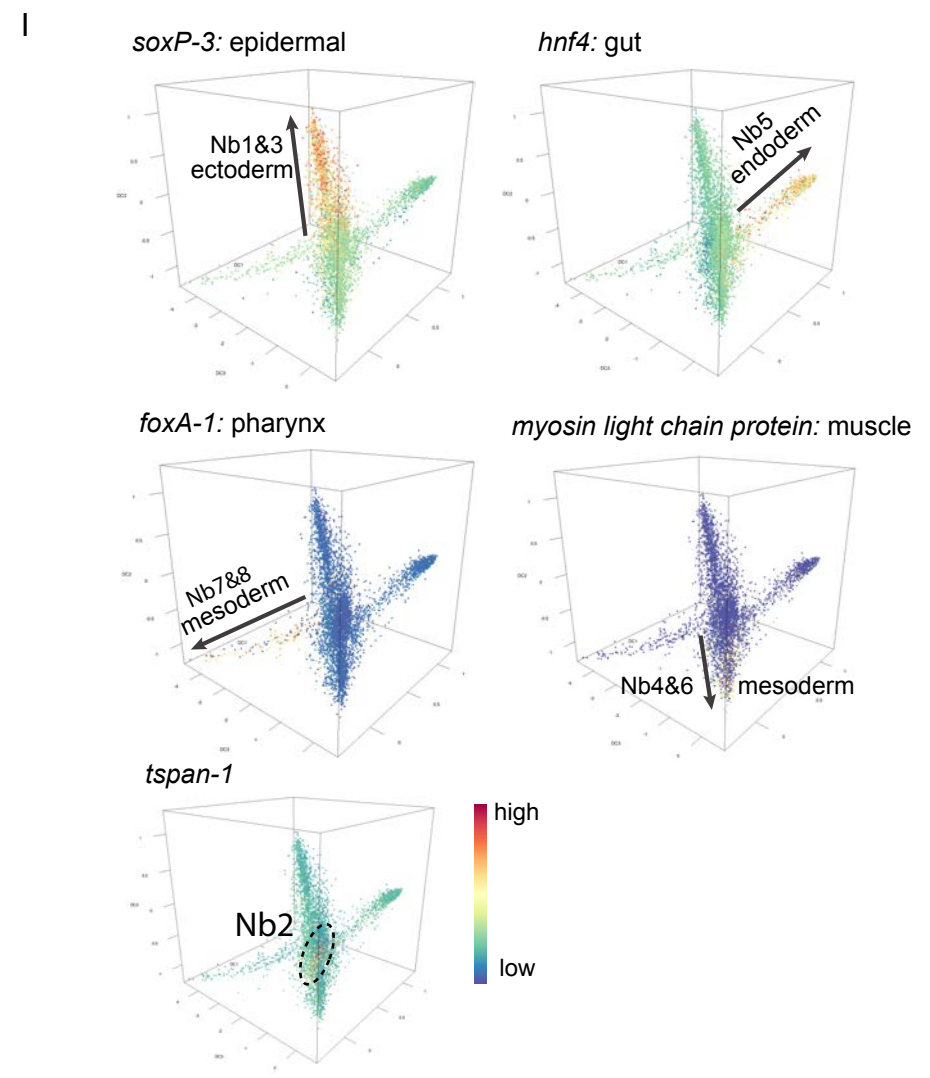

Supplement: NIHMS1826489-supplement-Figure_S3.pdf [file NIHMS1826489-supplement-Figure_S3.pdf]

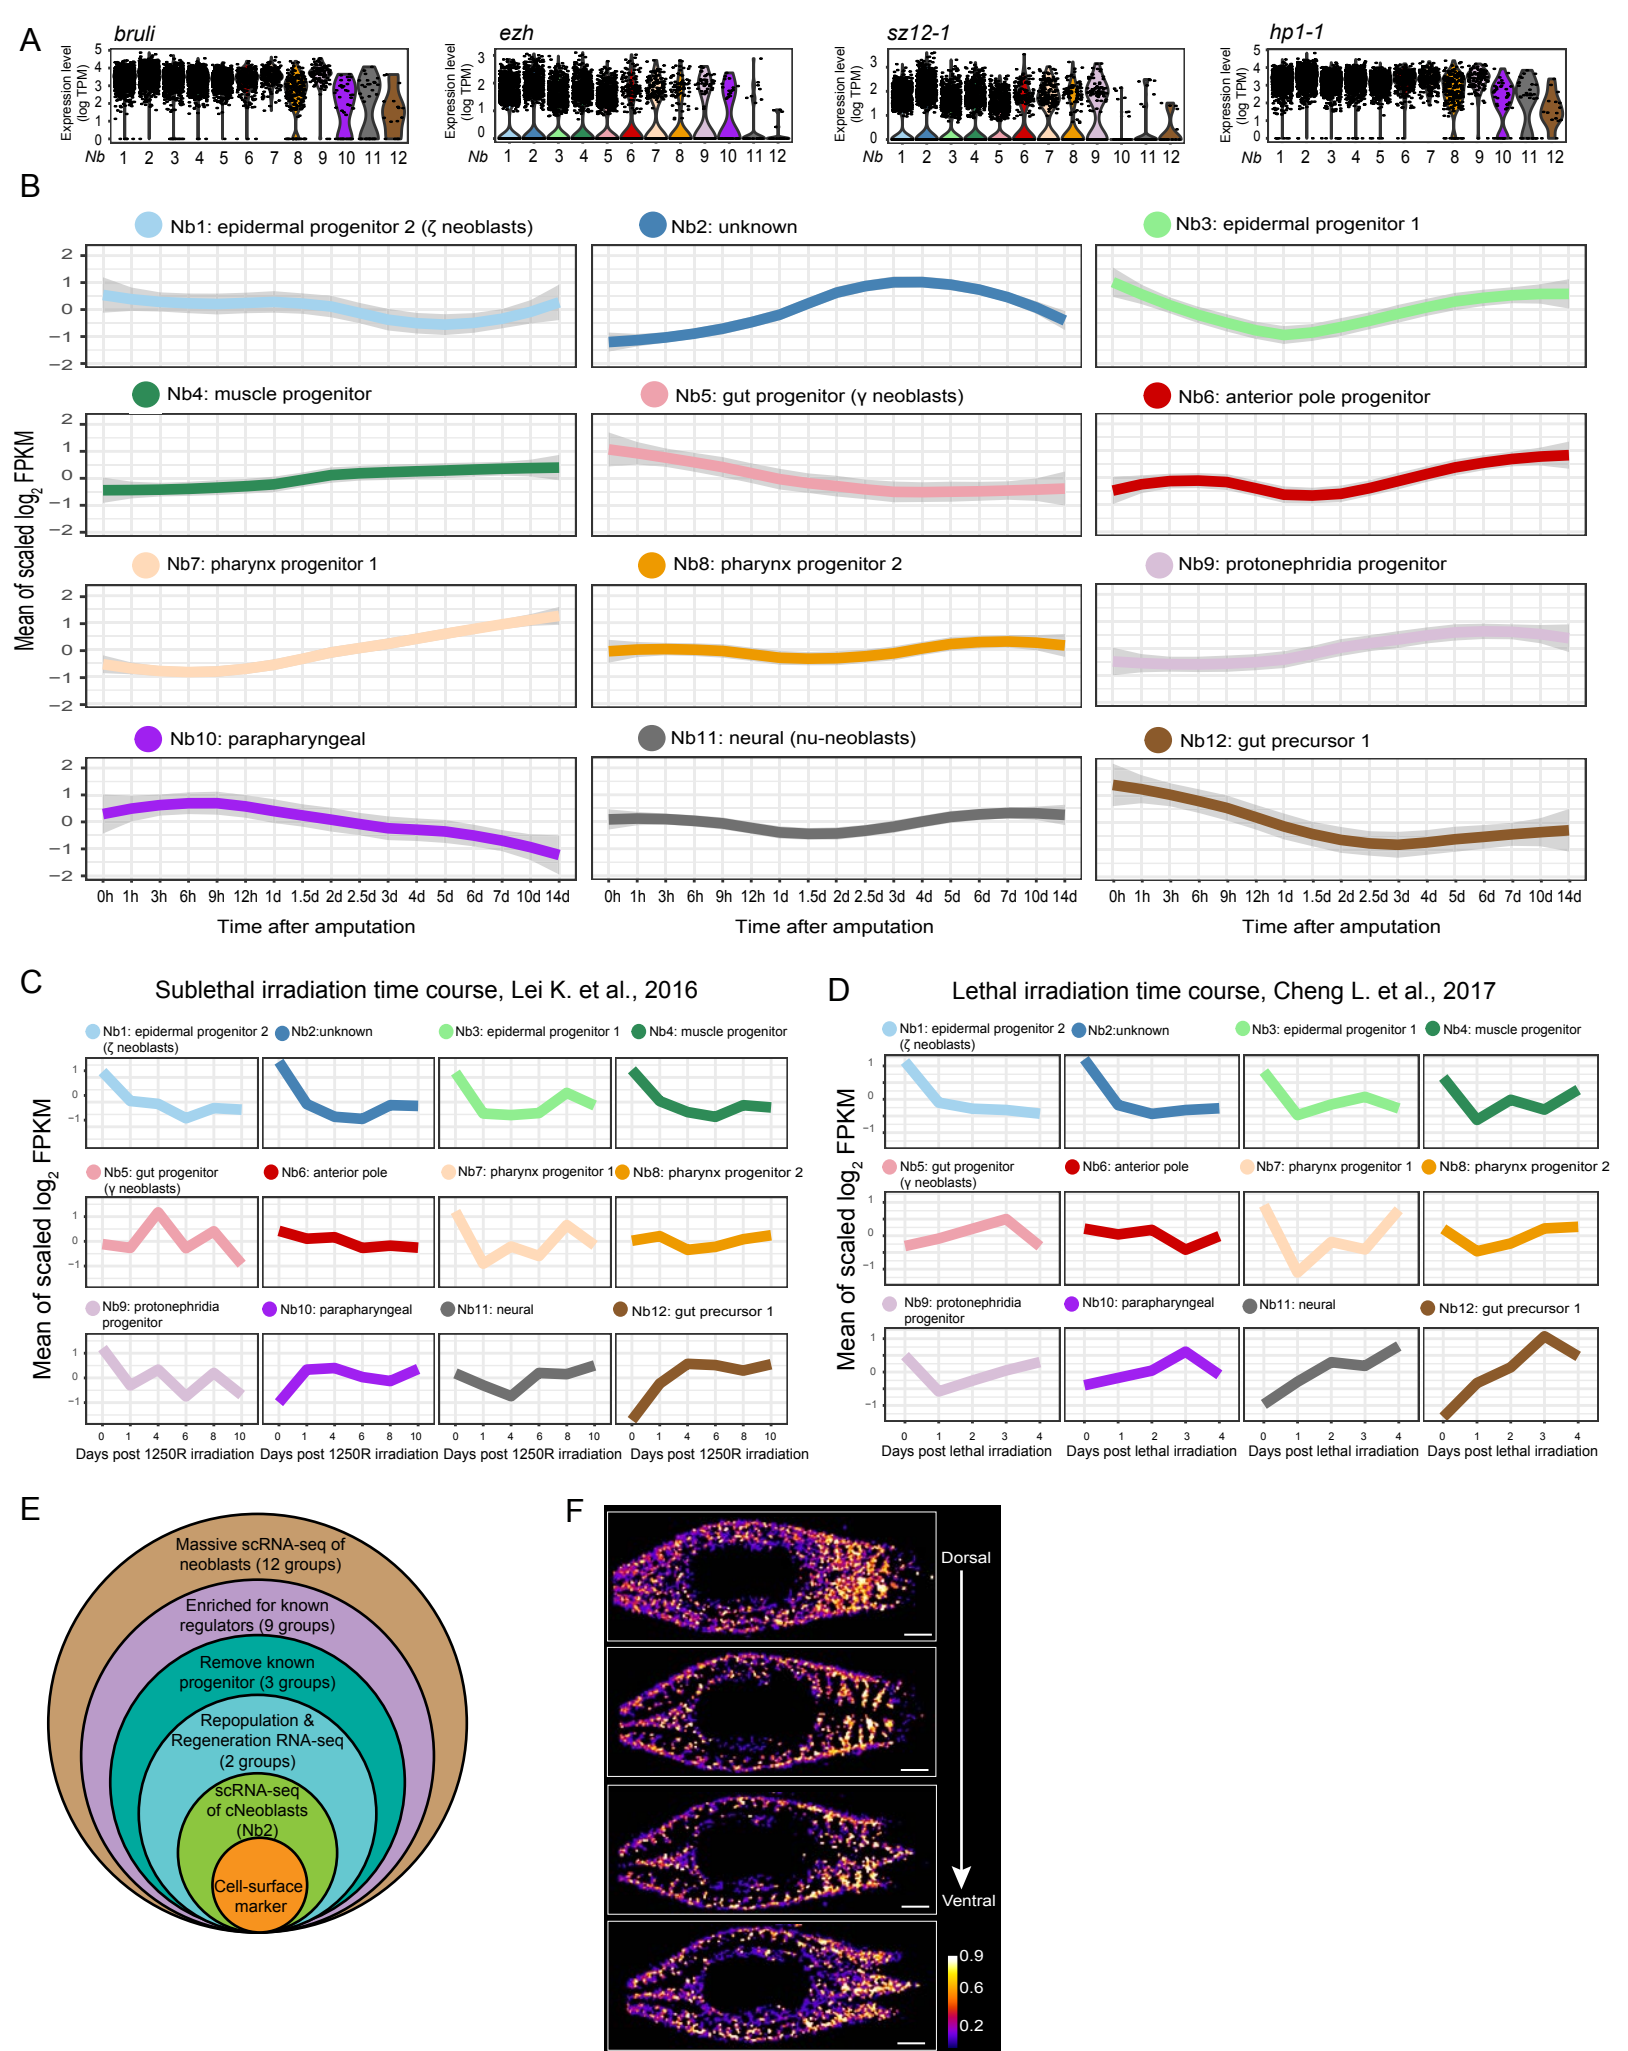

Supplement: NIHMS1826489-supplement-Figure_S4.pdf [file NIHMS1826489-supplement-Figure_S4.pdf]

A

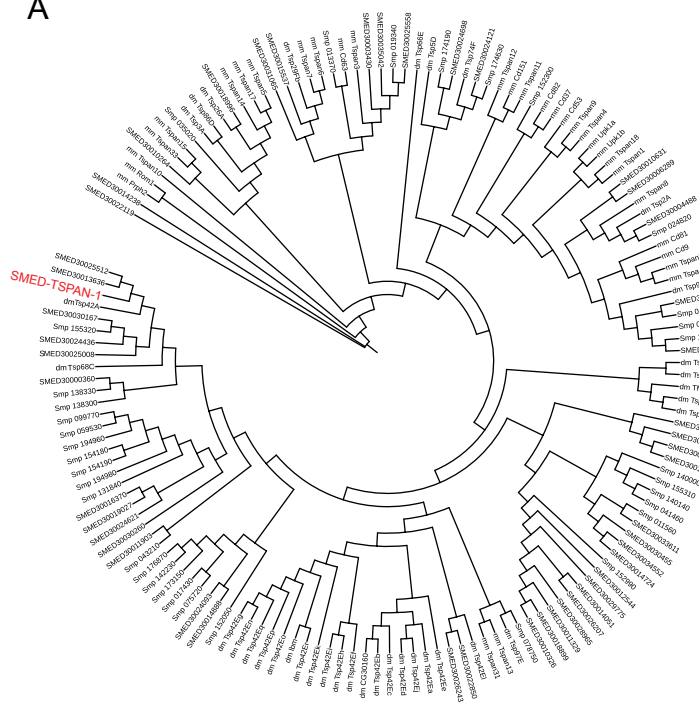

B

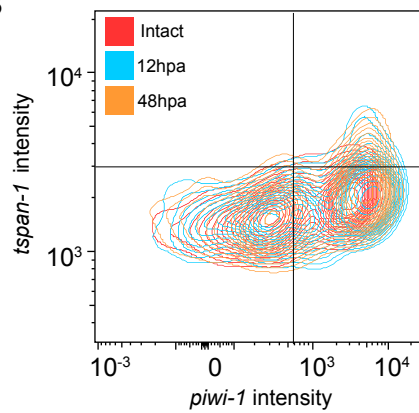

piwi-1 high population

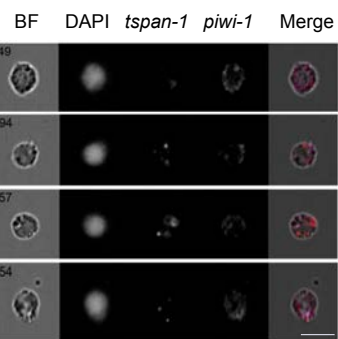

piwi-1 low population

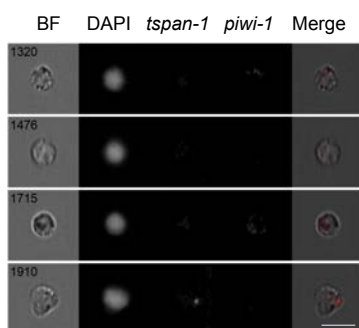

piwi-1 negative population

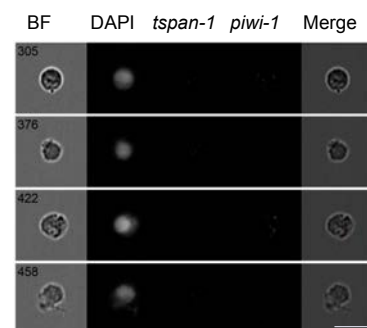

C

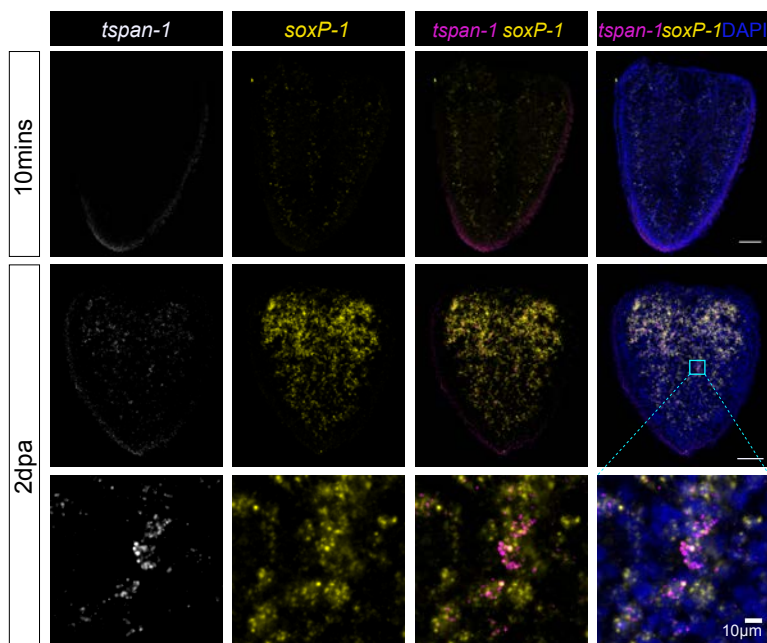

E

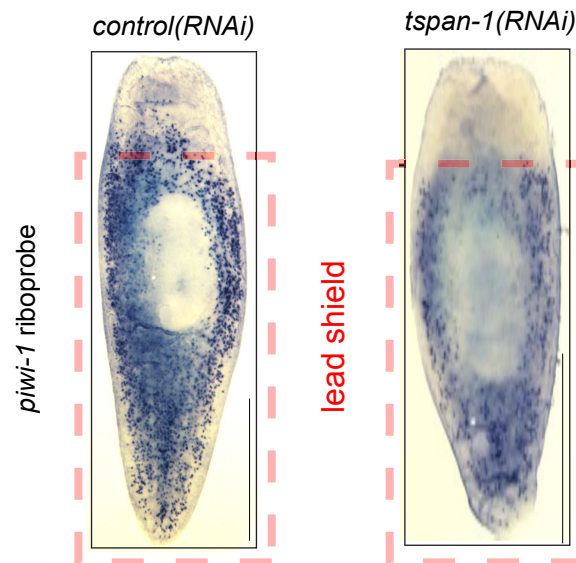

D

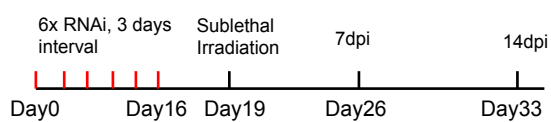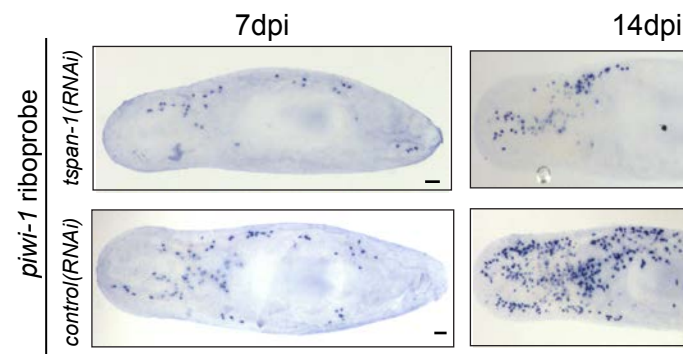

Supplement: NIHMS1826489-supplement-Figure_S5.pdf [file NIHMS1826489-supplement-Figure_S5.pdf]

**A**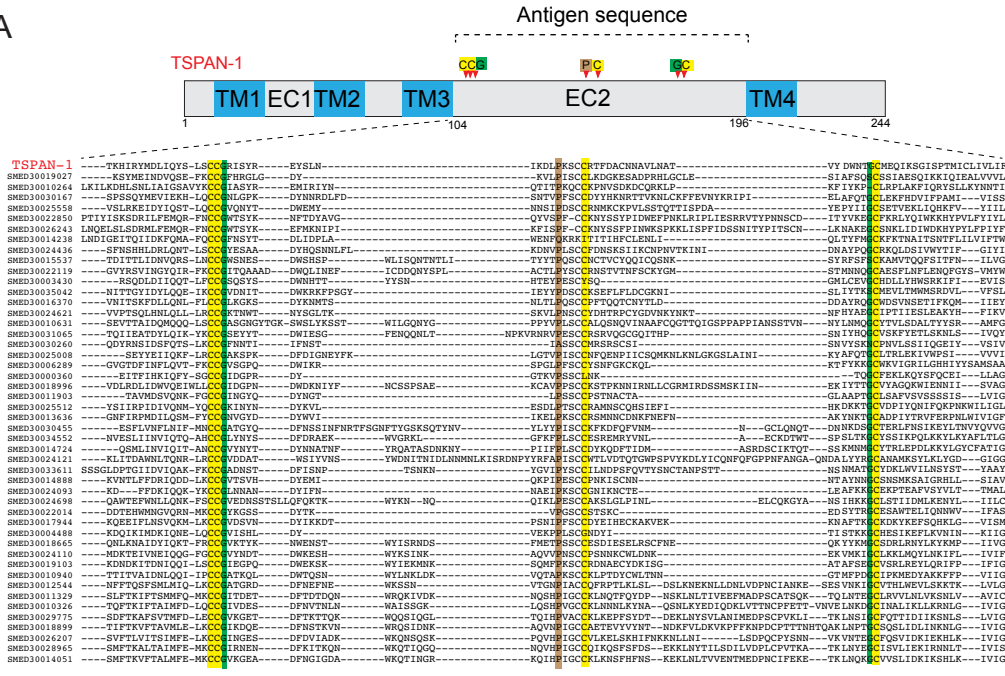**B**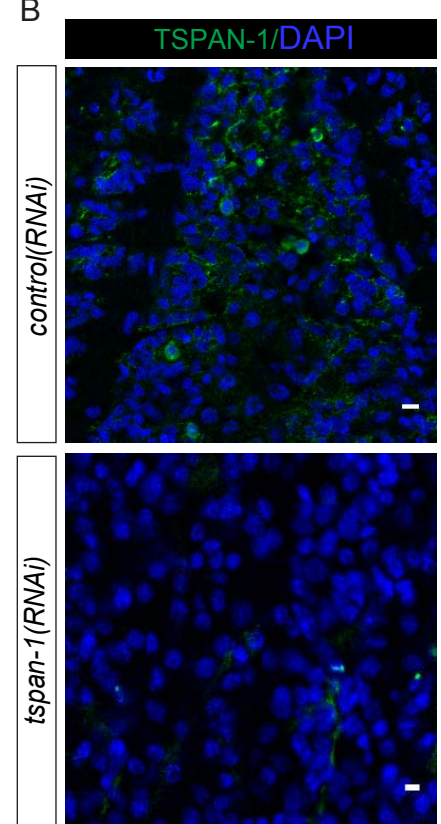**C** *unc*(RNAi) *tspan1*(RNAi)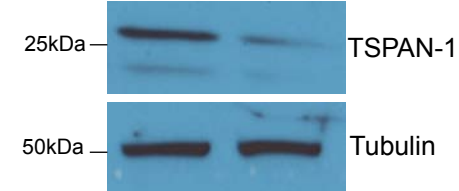**D**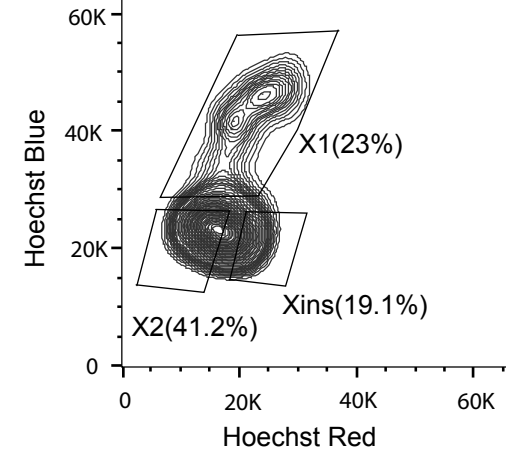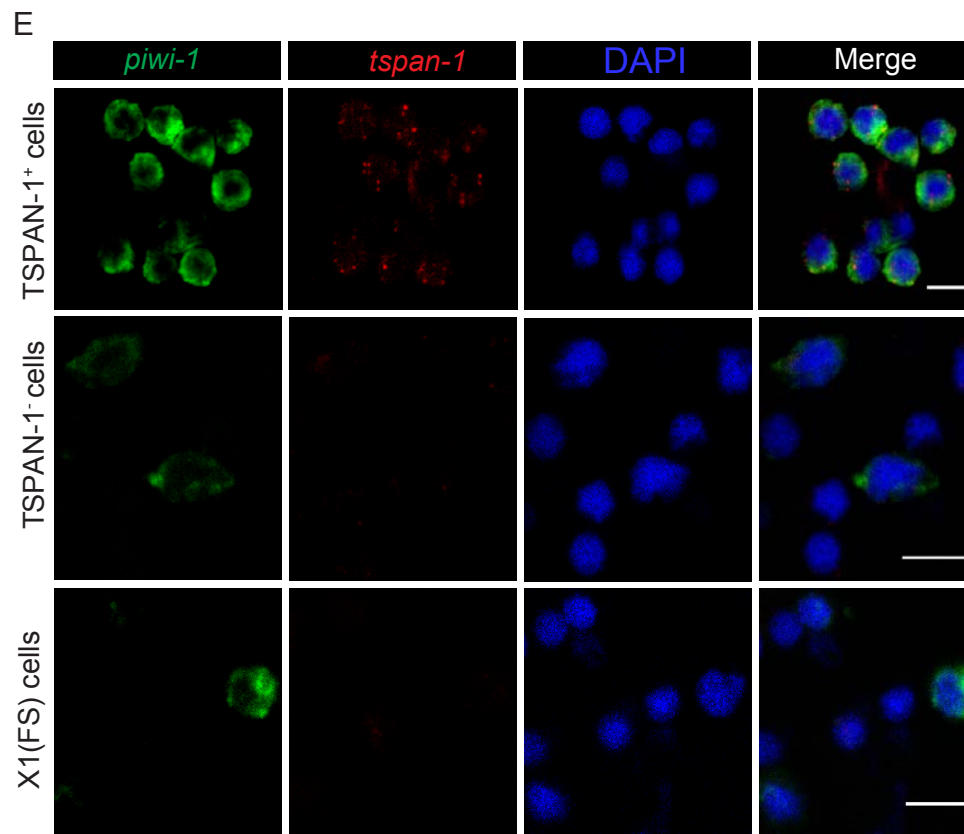**F**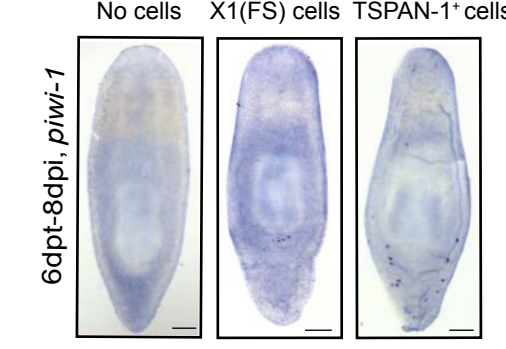

Supplement: NIHMS1826489-supplement-Figure_S6.pdf [file NIHMS1826489-supplement-Figure_S6.pdf]
